# Supplementary material for: In vitro study of the blood–brain barrier transport of bioactives from Mediterranean foods
Source: Royal Society of Chemistry journal article supplement (doi:10.1039/d3fo04760a), 2024-01-01
Supplement: d3fo04760a1.pdf [file d3fo04760a1.pdf]

### Supplementary material

**Table S1.** Chromatographic conditions for each compound under study.

| Compound    | Chromatographic conditions                                                                                                                                                                                                                                                                                                                                                                                                                                    |
|-------------|---------------------------------------------------------------------------------------------------------------------------------------------------------------------------------------------------------------------------------------------------------------------------------------------------------------------------------------------------------------------------------------------------------------------------------------------------------------|
| TYRS and HT | <ul style="list-style-type: none"><li>• Two phases: (A) aqueous formic acid solution 0.1% and (B) solution 0.1% of formic acid in methanol.</li><li>• Gradient: 0–1 min (5% B); 1–7 min (100% B); 7–8.5 min (100% B); 8.6–10 min (5% B).</li><li>• A target MS2 in negative mode was performed.</li><li>• Parallel Reaction Monitoring (PRM) of the [M+H]<sup>-</sup> at m/z 153.05572</li><li>• Normalized collision energy (NCE) was set at 25 eV</li></ul> |
| TYR and SER | <ul style="list-style-type: none"><li>• Two phases (A) solution 0.1% of formic acid in methanol and (B) aqueous formic acid solution 0.1%</li><li>• The gradient was: 0–1 min (5% B); 1–7.5 min (95% B); 7.5–8.6 min (95% B); 8.6–10 min (5% B).</li><li>• A target MS2 in positive mode was performed.</li><li>• PRM of the [M+H]<sup>-</sup> at m/z 182.08117 y 177.10224</li><li>• NCE was set at 40 eV</li></ul>                                          |
| PCA         | <ul style="list-style-type: none"><li>• Two phases (A) solution 0.1% of formic acid in methanol and (B) aqueous formic acid solution 0.1%</li><li>• The gradient was: 0–1 min (5% B); 1–7.5 min (95% B); 7.5–8.6 min (95% B); 8.6–10 min (5% B).</li><li>• A target MS2 in positive mode was performed.</li><li>• PRM of the [M+H]<sup>-</sup> at m/z 153.01933</li><li>• NCE was set at 40 eV</li></ul>                                                      |
